# Supplementary material for: Superparamagnetic Iron Oxide Nanoparticles-Complexed Cationic Amylose for In Vivo Magnetic Resonance Imaging Tracking of Transplanted Stem Cells in Stroke
Source: Nanomaterials (Basel). 2017 May 10;7(5):107. doi: 10.3390/nano7050107 (PMC5449988; doi:10.3390/nano7050107)
Supplement: Supplementary file 1 [file nanomaterials-07-00107-s001.pdf]

# Superparamagnetic Iron Oxide Nanoparticles-complexed Cationic Amylose for In Vivo Magnetic Resonance Imaging Tracking of Transplanted Stem Cells in Stroke

Bing-Ling Lin <sup>1,†</sup>, Jun-Zhao Zhang <sup>2,†</sup>, Lie-Jing Lu <sup>1</sup>, Jia-Ji Mao <sup>1</sup>, Ming-Hui Cao <sup>1</sup>, Xu-Hong Mao <sup>3</sup>, Fang Zhang <sup>1</sup>, Xiao-Hui Duan <sup>1</sup>, Chu-Shan Zheng <sup>1</sup>, Li-Ming Zhang <sup>2,3,4,\*</sup> and Jun Shen <sup>1,\*</sup>

<sup>1</sup> Department of Radiology, Sun Yat-Sen Memorial Hospital, Sun Yat-Sen University, Guangzhou 510120, Guangdong, China; linbling@mail2.sysu.edu.cn (B.L.L.); luliejingsysu@163.com (L.J.L.); canterburybells@126.com (J.J.M.); caominghui1019@163.com (M.H.C.); xinxin110007@126.com (F.Z.); duanxiaohui-128@163.com (X.H.D.); zhengchushan0311@126.com (C.S.Z.)

<sup>2</sup> Department of Polymer and Materials Science, School of Chemistry, Sun Yat-Sen University, Guangzhou 510275, Guangdong, China; zhjunzh3@mail2.sysu.edu.cn

<sup>3</sup> School of Materials Science and Engineering, Sun Yat-Sen University, Guangzhou 510275, Guangdong, China; m13929581729\_1@163.com

<sup>4</sup> Key Laboratory for Polymeric Composite and Functional Materials of Ministry of Education, Guangdong Provincial Key Laboratory for High Performance Polymer-based Composites, Key Laboratory of Designed Synthesis and Application of Polymer Material, Sun Yat-Sen University, Guangzhou 510275, Guangdong, China

\* Correspondence: ceszhlm@mail.sysu.edu.cn (L.M.Z.); shenjun@mail.sysu.edu.cn (J.S.); Tel.: +86-20-8411-2354 (L.M.Z.); +86-20-8133-2702 (J.S.)

<sup>†</sup> These authors contribute equally to this work.

## Appendix A

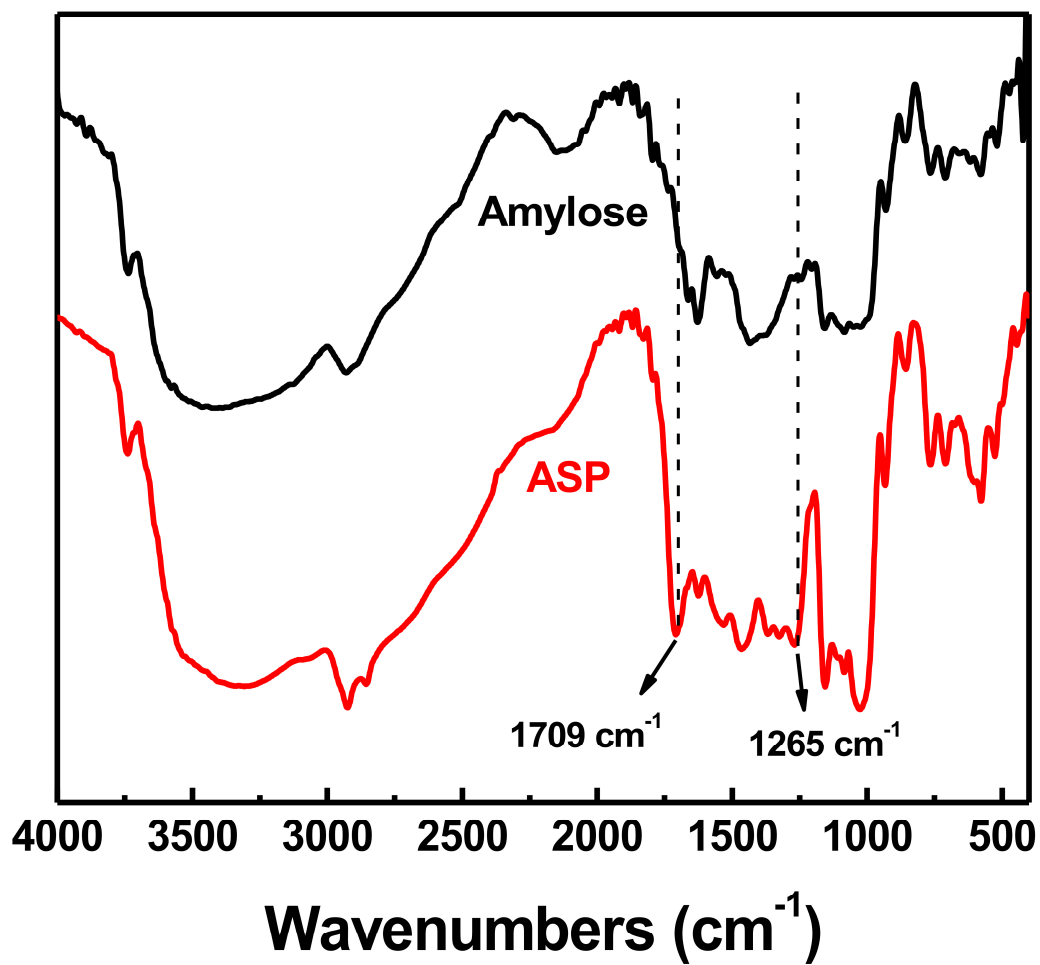

**Figure S1.** FTIR spectra of amylose and ASP. A new peak at 1709 cm<sup>-1</sup> and 1265 cm<sup>-1</sup> of ASP, which could be assigned to the C=O vibration of carbamate structures and C-N vibrations of aliphatic amines, indicate that spermine was grafted to amylose backbone with carbamate linkages.

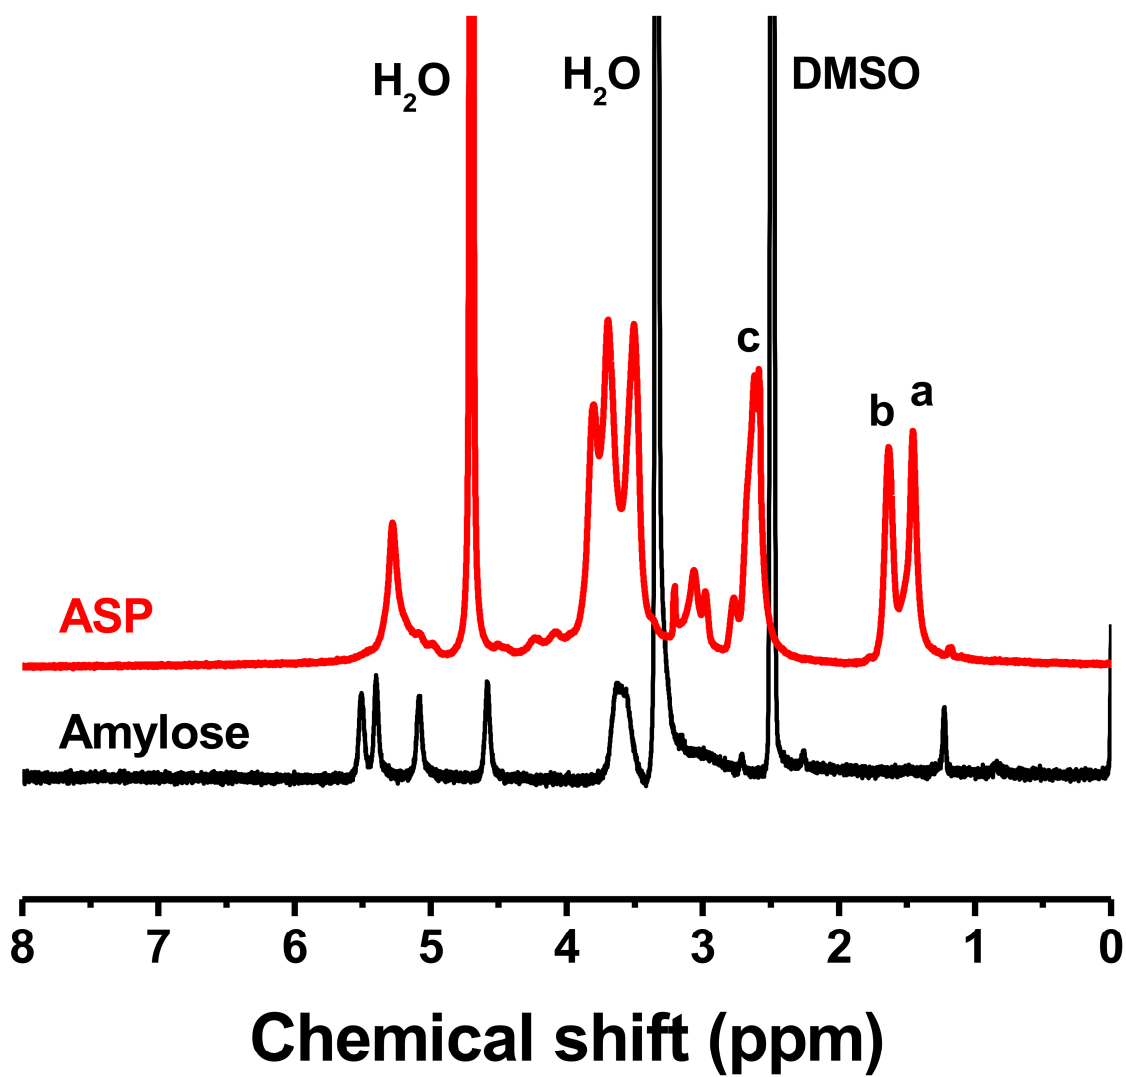

**Figure S2.**  $^1\text{H}$  NMR spectra of amylose and ASP. The proton peaks at 1.45, 1.63 and 2.62 ppm further confirmed that the oligoamine residues were conjugated with amylose.

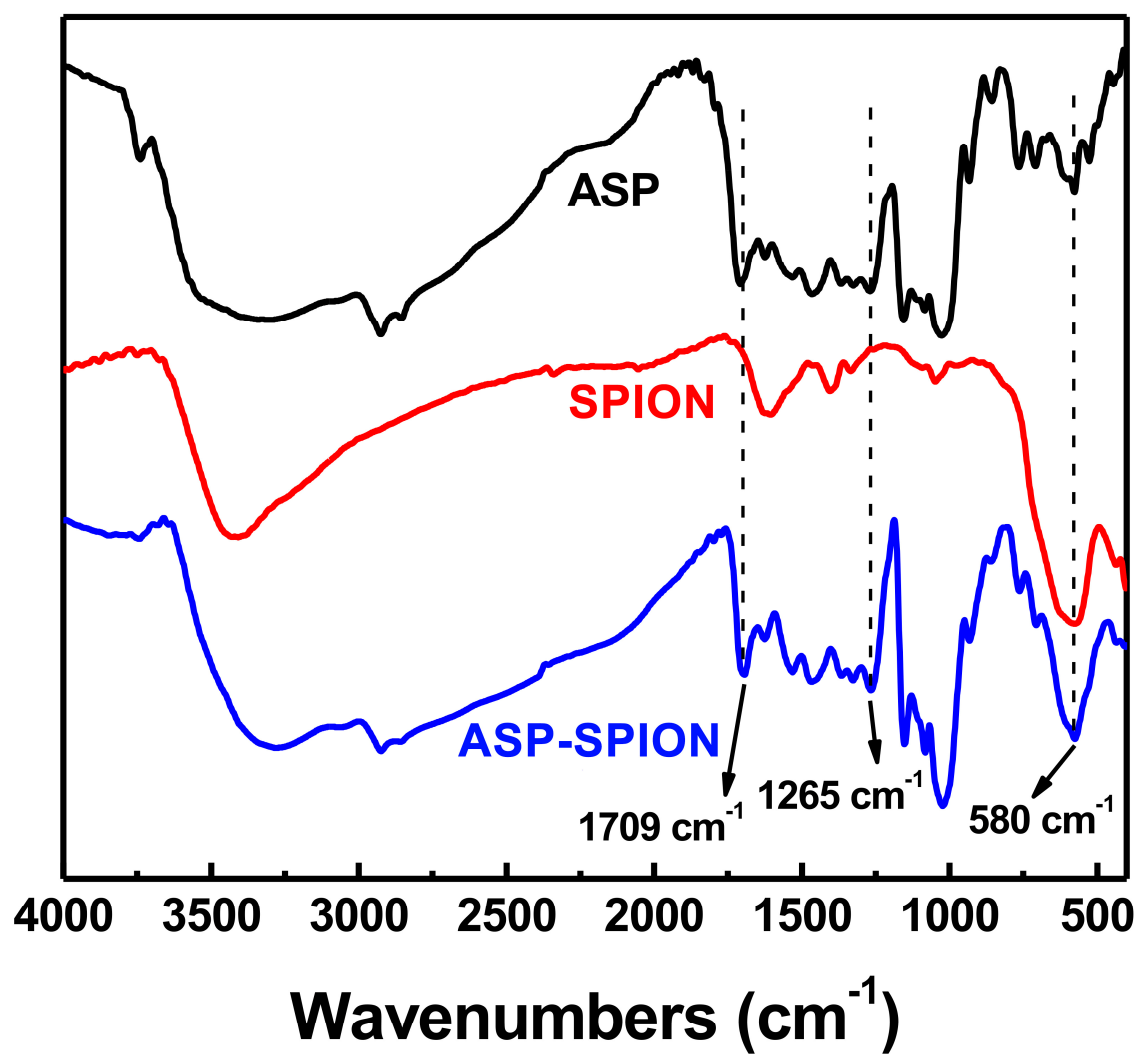

**Figure S3.** FTIR spectra of amylose, ASP, SPIONs and ASP-SPIONs. Characteristic absorption bands for C=O at 1709 cm<sup>-1</sup>, C-N at 1265 cm<sup>-1</sup> and Fe-O at 580 cm<sup>-1</sup> were observed in ASP-SPION.

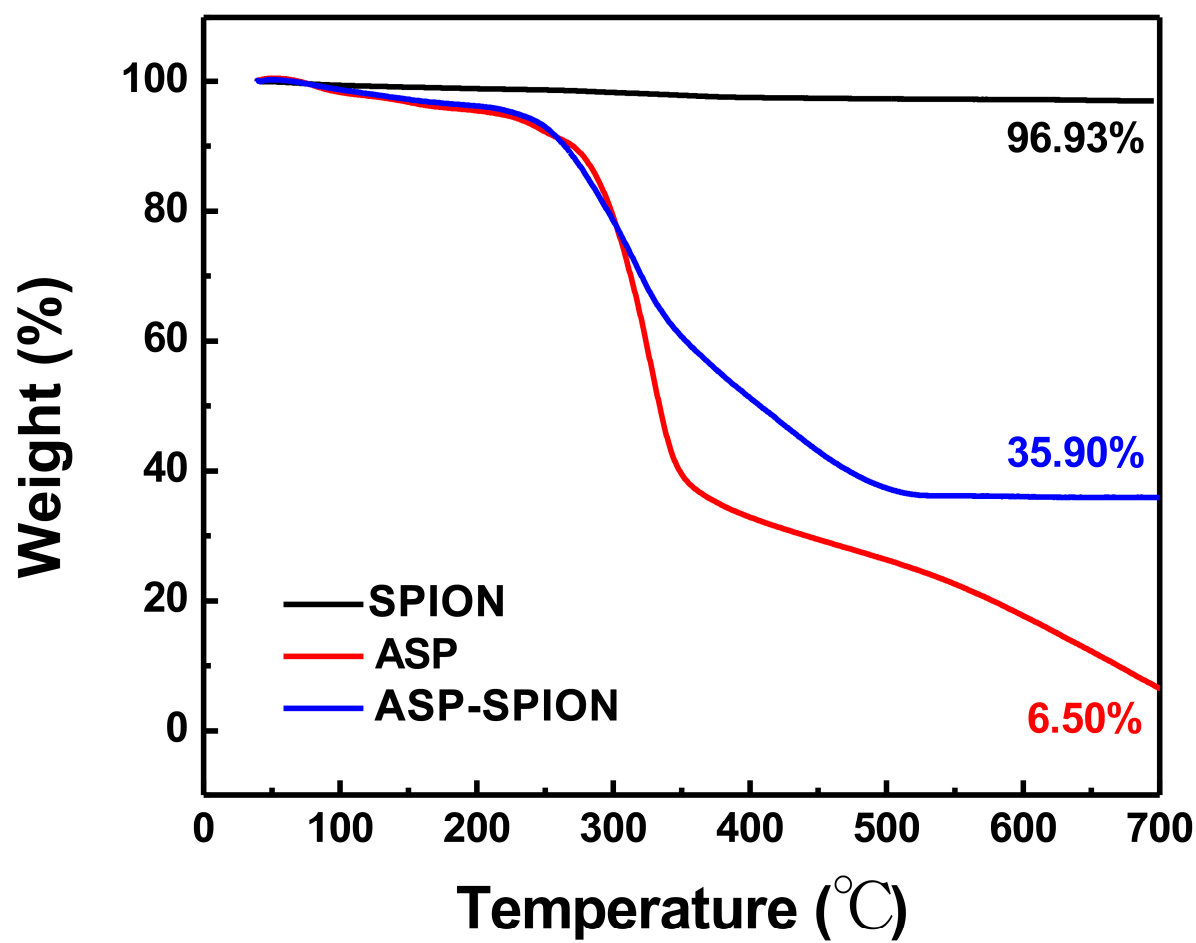

Figure S4. TG curves of native SPIONs, ASP and ASP-SPIONs.

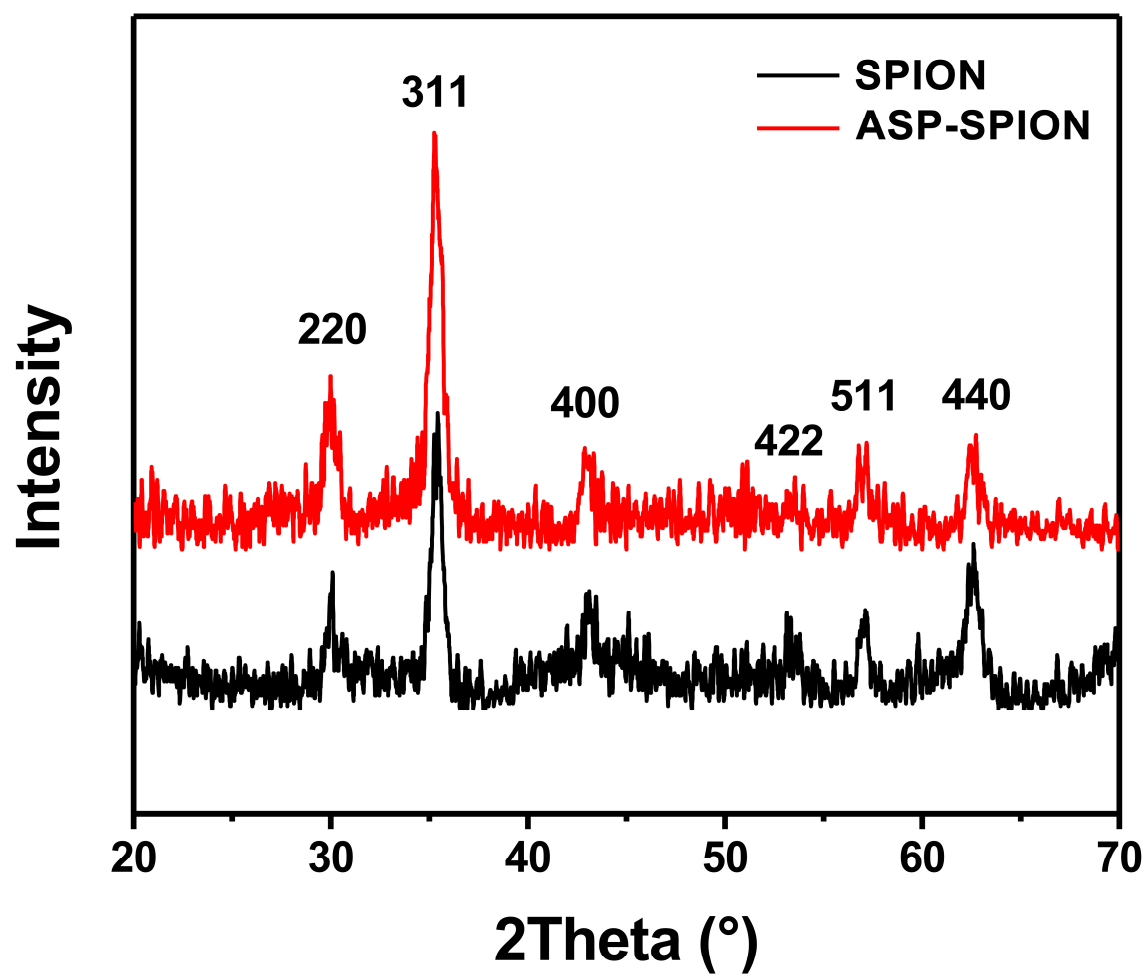

**Figure S5.** X-ray diffraction diagrams of native SPIONs and ASP-SPIONs.

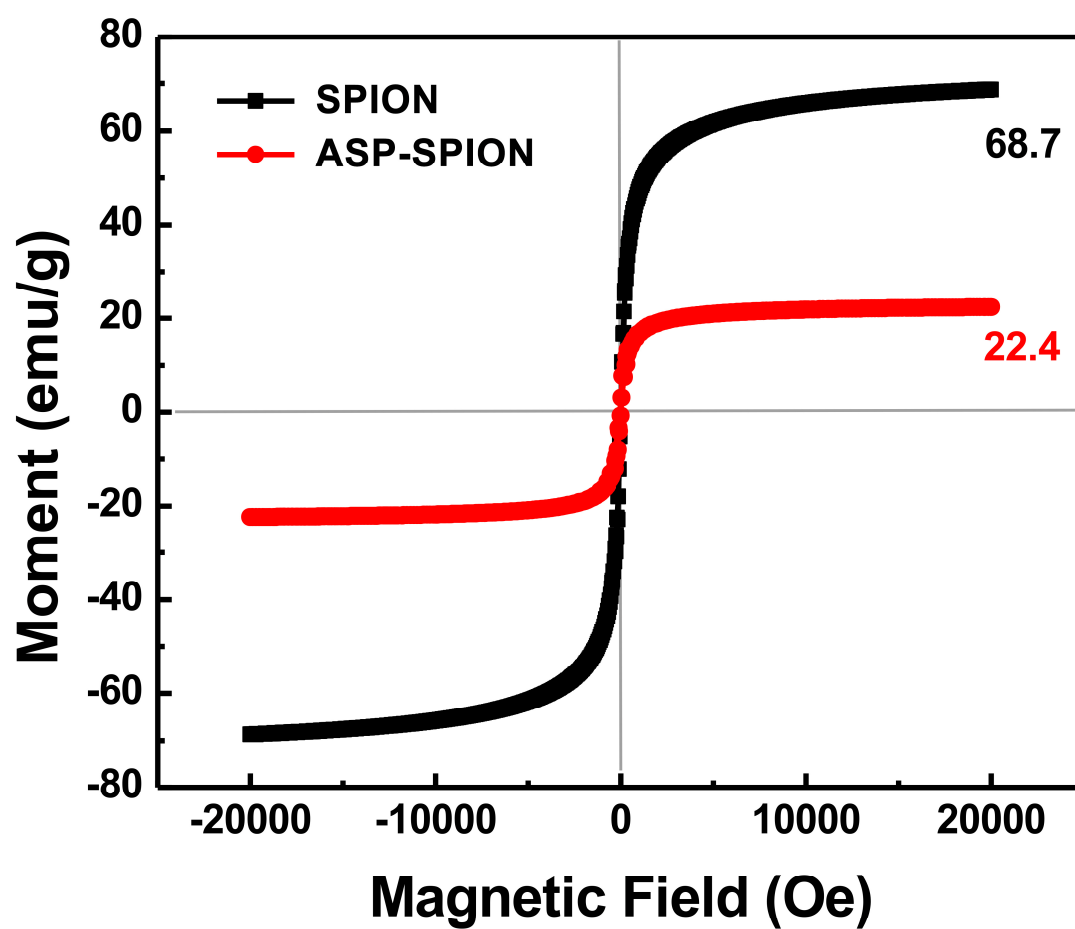

Figure S6. Magnetization curves of SPIONs and ASP-SPIONs. Graph shows that the modification of SPIONs by ASP didn't obviously affect the superparamagnetic property.

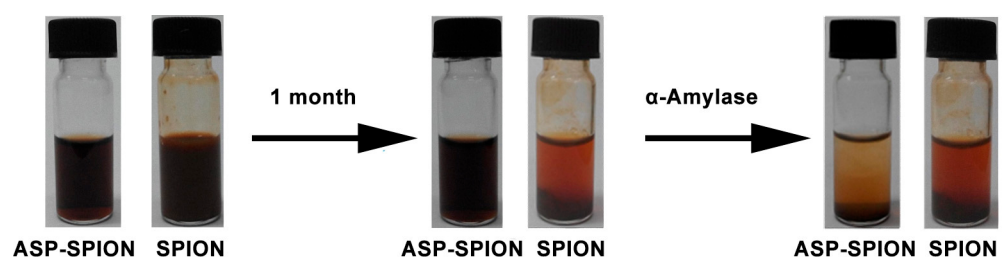

Figure S7. Aqueous dispersibility of ASP-SPIONs and SPIONs.
